# Supplementary material for: An Intronic SINE Insertion in FAM161A that Causes Exon-Skipping Is Associated with Progressive Retinal Atrophy in Tibetan Spaniels and Tibetan Terriers
Source: PubMed Central journal article supplement (PMC3976383; doi:10.1371/journal.pone.0093990), 2014-04-04

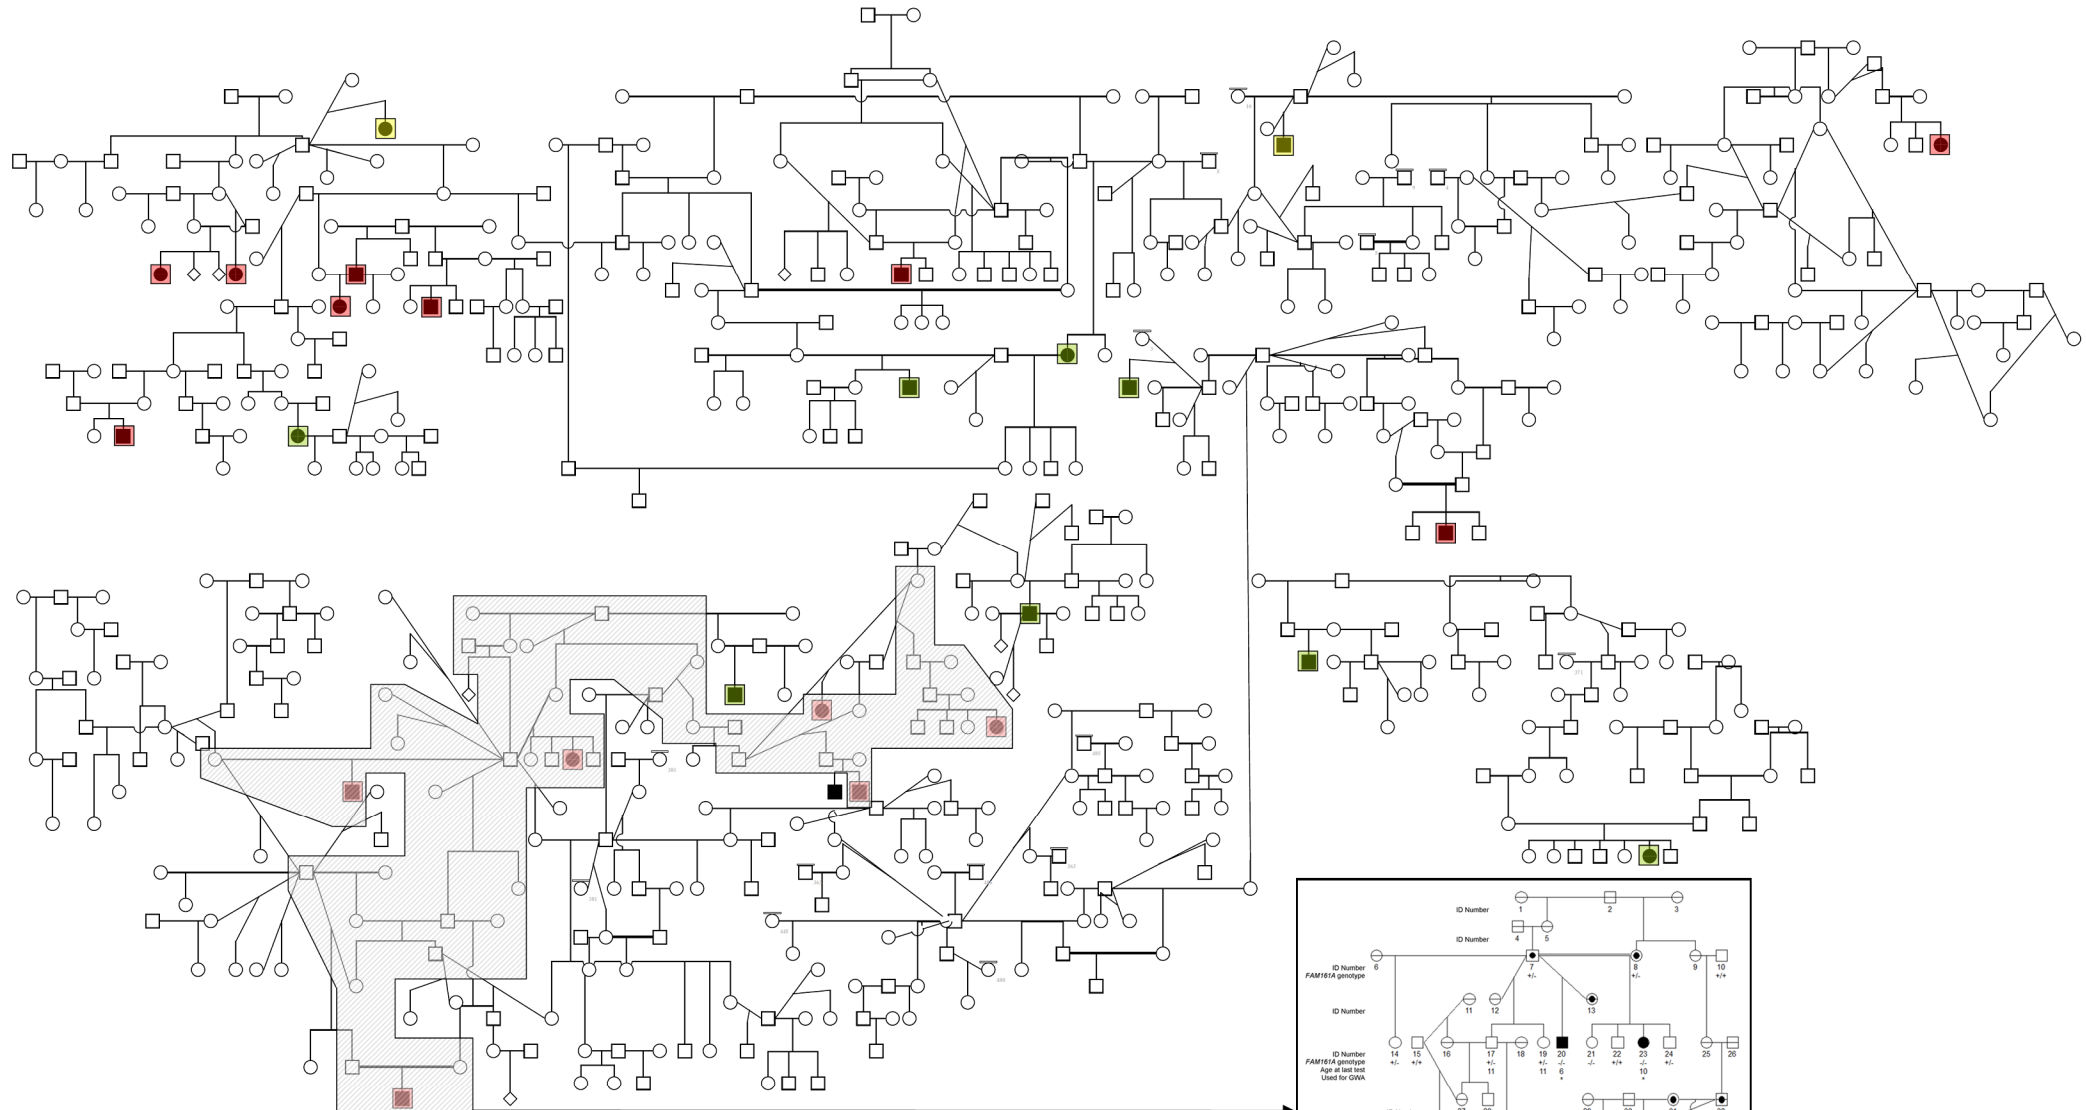

- PRA3 Affected
- PRA3 carrier/heterozygous
- Wildtype
- PRA reported, but evidence and sample unavailable

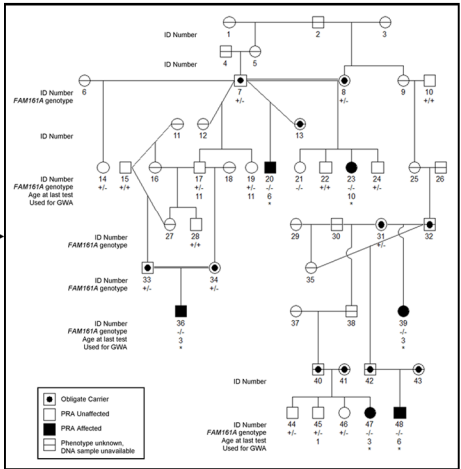

Supplement: pone.0093990.s003.pdf [file pone.0093990.s003.pdf]
