# Supplementary material for: An Intronic SINE Insertion in FAM161A that Causes Exon-Skipping Is Associated with Progressive Retinal Atrophy in Tibetan Spaniels and Tibetan Terriers
Source: PubMed Central journal article supplement (PMC3976383; doi:10.1371/journal.pone.0093990), 2014-04-04
Supplement: pone.0093990.s004.pdf [file pone.0093990.s004.pdf]

| F primer Name | F primer Seq (5'-3') (TAIL = TGACCGGCAGCAAATTG) | R primer Name | R primer Seq (5'-3')     | Product size (bp) | Tm | Genomic location (bp) | Microsatellite |
|---------------|-------------------------------------------------|---------------|--------------------------|-------------------|----|-----------------------|----------------|
| CFA10_61.66F  | TAIL-TAGACCAGGCAATTCAAATC                       | CFA10_61.66R  | TTGAGGATATCAAACCCCTTCAC  | 193               | 56 | 61,659,255            | (CA)14         |
| CFA10_61.75F  | TAIL-ATGGAAGTCCATATGATCCA                       | CFA10_61.75R  | GCATGTCCCTGTTATGGCTA     | 277               | 56 | 61,752,065            | (CA)21         |
| CFA10_61.87F  | TAIL-AGCTGGGTCCCTTCAGTTTA                       | CFA10_61.87R  | CAGCCAGTACGCTGTGATGCTT   | 236               | 56 | 61,868,609            | (GT)20         |
| CFA10_61.96F  | TAIL-CCTTTGTGCATTCTCTGTTCC                      | CFA10_61.96R  | TCCTTAGGCCACAGGATTT      | 234               | 56 | 61,963,812            | (GT)15         |
| CFA10_62.34F  | TAIL-TCTGCTCTTTAAGCCTGATG                       | CFA10_62.34R  | GAATGCATCTCAACCACCATT    | 212               | 56 | 62,337,915            | (GT)18         |
| CFA10_62.43F  | TAIL-TCTGTTCAAGAGCTGTGGAT                       | CFA10_62.43R  | TTCTGTGGCAGCTCTCCTT      | 274               | 56 | 62,434,740            | (GT)15         |
| CFA10_62.49F  | TAIL-ACTGAGGGATGCAGAAAGTGA                      | CFA10_62.49R  | ATATCTGAGCGCAGCATGAAG    | 174               | 56 | 62,487,468            | (CA)16         |
| CFA10_62.55F  | TAIL-TTAAAGGCCAACCACTTCCA                       | CFA10_62.55R  | TGCTTCTTCAACCAGATTGTT    | 229               | 56 | 62,552,700            | (CA)20         |
| CFA10_62.79F  | TAIL-GCCAAATATGCAAGTAGACCA                      | CFA10_62.79R  | GCATGATACCCCTTAGATTACC   | 176               | 56 | 62,786,640            | (GT)15         |
| CFA10_62.98F  | TAIL-CCTGCATGTTCTCACAAAGGT                      | CFA10_62.98R  | GTGGTGGTAGTTGGACAATGC    | 219               | 56 | 62,978,760            | (CA)17         |
| CFA10_63.01F  | TAIL-ACCTCACTGACAGGCTCACTT                      | CFA10_63.01R  | TGAATGGAAGCTGTGTTTGTTC   | 247               | 56 | 63,008,220            | (CT)21         |
| CFA10_63.20F  | TAIL-ATCACCTCAAATCCACCACAA                      | CFA10_63.20R  | TATTCCTTGGGCAGGTTTAC     | 241               | 56 | 63,199,200            | (CA)15         |
| CFA10_63.33F  | TAIL-ATGAAAGCAAAGCAGGGAGAT                      | CFA10_63.33R  | ATTGAAGGCTGAGGGAGCTAA    | 209               | 56 | 63,331,680            | (CA)17         |
| CFA10_63.40F  | TAIL-TAGCACCAGAACCTTCCACTC                      | CFA10_63.40R  | GCATCACAACACTCACTCTGC    | 205               | 56 | 63,402,960            | (CA)21         |
| CFA10_63.51F  | TAIL-GGAGTTTACCATAAGTAAGCTTCTCC                 | CFA10_63.51R  | TGCTTCTGACCATTCCACAAT    | 228               | 56 | 63,509,760            | (CA)18         |
| CFA10_63.71F  | TAIL-TCCTCTCTCCAAACACTTACC                      | CFA10_63.71R  | ATGCATACAGCACTTGACACAC   | 184               | 56 | 63,705,840            | (GT)16         |
| CFA10_63.82F  | TAIL-CGCAGCCTTTAAATCATCCTT                      | CFA10_63.82R  | GCAGCTCACATGAACCATTT     | 249               | 56 | 63,820,800            | (GT)17         |
| CFA10_63.86F  | TAIL-TTCCATTCTGAAGGCCCTAAT                      | CFA10_63.86R  | AAGGTGTGAGTGAAGGAAAGC    | 244               | 56 | 63,859,200            | (GT)22         |
| CFA10_63.91F  | TAIL-CTCCACCATTGTCTCTCAT                        | CFA10_63.91R  | GAACCTTGAAGCAACAGCA      | 205               | 56 | 63,913,440            | (CT)17         |
| CFA10_63.93F  | TAIL-CCCTACCAAGTTCTACCCCTT                      | CFA10_63.93R  | TTCAGCATGACAAGGGACAC     | 242               | 56 | 63,934,627            | (GA)16         |
| CFA10_64.00F  | TAIL-GCAGCACTATCAATAGCCAAA                      | CFA10_64.00R  | TCTACTTCATCCATGTCTTGTGC  | 177               | 58 | 63,998,363            | (GT)19         |
| CFA10_64.08F  | TAIL-CCCTGTATTGATTAGAGCAGCA                     | CFA10_64.08R  | GATCACCTTGGTTCTGTGCTCA   | 235               | 56 | 64,075,600            | (CA)19         |
| CFA10_64.112F | TAIL-GCATCTGCAATCAATTTGAGG                      | CFA10_64.112R | CTCCCTCTCCATTGTCCCTCT    | 265               | 58 | 64,112,403            | (AT)17         |
| CFA10_64.113F | TAIL-CATCAGTTTCATCCCGTAGCAT                     | CFA10_64.113R | GGCAGCATAGGAGTAAACAGCA   | 194               | 56 | 64,113,386            | (CA)14         |
| CFA10_64.19F  | TAIL-ACTGCACCTCATGCTTGTCTT                      | CFA10_64.19R  | GGTGTTCAGTATGTGGCTATGTT  | 237               | 56 | 64,186,104            | (GT)14         |
| CFA10_64.20F  | TAIL-AAGTTCATGCCAATATCCTAGAGTC                  | CFA10_64.20R  | TTGTGTGCTATTGGGTTTC      | 366               | 56 | 64,201,234            | (GA)16         |
| CFA10_64.22F  | TAIL-GCAGTTGAATAACCTGCTTGC                      | CFA10_64.22R  | TATCCTTCTTCTCCGCCACTT    | 246               | 56 | 64,217,353            | (CA)16         |
| CFA10_64.51F  | TAIL-AGACCAGCTTTTGTCTCAGA                       | CFA10_64.51R  | CTGCATTAATGGTCAAAGG      | 267               | 57 | 64,508,603            | (TG)14         |
| CFA10_64.57F  | TAIL-CATGTTGTATGGAATGCAAG                       | CFA10_64.57R  | AGTGAACCCCGCAGGTTAGT     | 309               | 57 | 64,572,573            | (AC)11         |
| CFA10_64.71F  | TAIL-CCCCTAAGCCTGATCCAATAA                      | CFA10_64.71R  | TGAAAGGAAATGATGATTTTGTCT | 275               | 57 | 64,713,419            | (TG)12         |
| CFA10_65.18F  | TAIL-CAAGGGTCTAATTTCCCTTTCC                     | CFA10_65.18R  | TGGGTACCAAGTGAATTTTGG    | 127               | 57 | 65,182,153            | (AC)18         |
| CFA10_65.44F  | TAIL-TGAACTCCTCAGACCTGCAAT                      | CFA10_65.44R  | CTCTGCTCCAGTCAGATTTGG    | 304               | 57 | 65,447,202            | (AG)16         |
| CFA10_65.53F  | TAIL-AGCAGTTTTGAAGCATCATGG                      | CFA10_65.53R  | AAAAGTAGCCCAAGATCAACCA   | 120               | 57 | 65,529,249            | (TG)18         |
| CFA10_65.63F  | TAIL-CAGATCTTGAGAGGGAAAGAGAA                    | CFA10_65.63R  | CATAGTTTCTGCCAAGTACTGTCT | 220               | 56 | 65,625,939            | (TA)20         |
| CFA10_65.78F  | TAIL-GTTCACTCCACTCCCATTTA                       | CFA10_65.78R  | GGCAGACAACAAAACATCCAT    | 314               | 57 | 65,784,034            | (TC)14         |
| CFA10_65.93F  | TAIL-CCTGTTGTGTTCCAGCAAGGAT                     | CFA10_65.93R  | AGTTATCGCTGCCTCTCCCTC    | 358               | 57 | 65,931,460            | (TG)11(TA)10   |
| CFA10_66.01F  | TAIL-TGCAAAAAGTGAAGACAGATCC                     | CFA10_66.01R  | TCTGTGTGATCTGCAGCTGTT    | 322               | 57 | 66,013,662            | (GT)12         |
| CFA10_66.06F  | TAIL-CCGTATTCTCCCTGTAGTCC                       | CFA10_66.06R  | TCCAGATTTCCAGCATGATTC    | 317               | 57 | 66,058,427            | (AT)20         |
| CFA10_66.16F  | TAIL-CTCTGTGTTTATTGGCGCATT                      | CFA10_66.16R  | GGCAGACCTCATTCTTTTCT     | 183               | 56 | 66,162,019            | (AC)15         |
| CFA10_66.3F   | TAIL-GCAGACAGCCTTTGTTTGAC                       | CFA10_66.3R   | AGTGTACTTTGCCCGGCTAC     | 202               | 60 | 66,303,329            | (GT)14         |
| CFA10_66.38F  | TAIL-GGGAAGAAAGAACTCTGGAA                       | CFA10_66.38R  | TCCTTCTTTCCATTACCTCTG    | 269               | 57 | 66,379,163            | (CA)11         |
| CFA10_66.4F   | TAIL-CCCCACACATCAACATAGGTC                      | CFA10_66.4R   | GCTATGCAGCATTATTTTGG     | 296               | 57 | 66,395,178            | (TA)14         |
| CFA10_66.45F  | TAIL-GTGAATGTATTCCGATGGT                        | CFA10_66.45R  | ATGTCTTATGGCTTTTGGTT     | 242               | 57 | 66,448,543            | (TA)18         |
| CFA10_66.51F  | TAIL-GGAGAAGGAAGTTTGCAG                         | CFA10_66.51R  | GCCAAAGTCTCAAAGGGATCT    | 314               | 56 | 66,509,954            | (TC)14         |
| CFA10_66.56F  | TAIL-CACTGGCACCAGGTTAAATGT                      | CFA10_66.56R  | CCTATGGGGCTCTGGATAAAT    | 348               | 57 | 66,557,299            | (AG)12         |
| CFA10_66.61F  | TAIL-CTCCTACTGGGAGCCAAAAC                       | CFA10_66.61R  | CCACATCCTCTCACCCTGTA     | 212               | 57 | 66,611,818            | (AC)20         |
| CFA10_66.68F  | TAIL-GCTGCATTGCTGCTTATTTTC                      | CFA10_66.68R  | AGGTTAAAGCAGCACCAATC     | 296               | 57 | 66,684,676            | (TC)21(TG)20   |
| CFA10_66.71F  | TAIL-CCACCCTCATGTTTCTCTGTT                      | CFA10_66.71R  | CACCATCACTACCAATAGGG     | 301               | 57 | 66,710,025            | (TG)16         |
| CFA10_66.99F  | TAIL-TTAGGATTGGGGTTCAGTG                        | CFA10_66.99R  | TCAGGTGAAAGGAAGAACAA     | 304               | 57 | 66,985,774            | (CT)15         |
| CFA10_67.06F  | TAIL-GAAAGTGGAGGGAAAGTGAC                       | CFA10_67.06R  | AACCGGTTGAACCATTTT       | 236               | 57 | 67,056,476            | (AC)15         |
| CFA10_67.16F  | TAIL-CTGCACTGTTTCTTCTCTG                        | CFA10_67.16R  | ATCTGGGGTCTTTTGTGTT      | 270               | 57 | 67,164,626            | (CA)21         |
| CFA10_67.39F  | TAIL-CCAGGTTTGGGGTGTATTCT                       | CFA10_67.39R  | CCAGTGGTCACTCAACAAGT     | 244               | 57 | 67,385,860            | (GT)13         |
| CFA10_67.48F  | TAIL-TGAACCTCCGAAGTCACTTGT                      | CFA10_67.48R  | GGAAAAGTGTAAAGGGGACCA    | 258               | 57 | 67,482,874            | (TC)19         |
| CFA10_67.73F  | TAIL-TGCTTCTGAGGACAGGATATT                      | CFA10_67.73R  | TGCTTGCCTGCTATTAAGTTC    | 302               | 57 | 67,729,134            | (GA)13         |
| CFA10_67.94F  | TAIL-GGTTTCATGCCCTTAATAGGC                      | CFA10_67.94R  | ATGCCCTCACACTGAAATCAC    | 237               | 57 | 67,940,561            | (GT)10         |
| CFA10_68.04F  | TAIL-CTCCGGGACTCTCAAATTAC                       | CFA10_68.04R  | TCTGACTGGGAAAGTGGTTG     | 263               | 57 | 68,043,943            | (AC)20         |
| CFA10_68.11F  | TAIL-TCTAGGCTGGGCTTGAAGT                        | CFA10_68.11R  | TGTCAATTGATCCCACTCCAT    | 277               | 57 | 68,110,195            | (GT)32         |
| CFA10_68.42F  | TAIL-TTTCCTGCTCCATTGATGTC                       | CFA10_68.42R  | CAGAATGTGGGTGCTTTTCAT    | 314               | 57 | 68,422,023            | (GT)17         |
| CFA10_68.54F  | TAIL-GTGACCATCTGGACTACCCAT                      | CFA10_68.54R  | ACAGTGATTAACAGGGACCAG    | 199               | 57 | 68,544,337            | (TC)24         |
| CFA10_68.61F  | TAIL-AAAACCTTTCTCCTCCCTTC                       | CFA10_68.61R  | ATGTAGGCCACTTTTGTCTT     | 184               | 57 | 68,607,662            | (CA)15         |

| PCR reaction components                           | Final Concentration |
|---------------------------------------------------|---------------------|
| dNTPs (NEB)                                       | 0.2 mM              |
| Tailed Forward primer                             | 0.1 µM              |
| Reverse Primer                                    | 0.25 µM             |
| 5'-6FAM-CAATTTTCTGCGGGTCA-3'                      | 0.1 µM              |
| PCR buffer (Applied Biosystems)                   | 1X                  |
| MgCl <sub>2</sub> (Applied Biosystems)            | 1.5 mM              |
| AmpliTaq Gold DNA Polymerase (Applied Biosystems) | 1.2 units           |
| DNA template                                      | 40 ng               |
| PCR grade water                                   | up to 12 µL         |

**Thermal Cycling Parameters**

|               |     |
|---------------|-----|
| 94°C - 4 min  | X30 |
| 94°C - 1 min  |     |
| Tm°C - 1 min  |     |
| 72°C - 2 min  | X8  |
| 94°C - 1 min  |     |
| 50°C - 1 min  |     |
| 72°C - 2 min  |     |
| 72°C - 30 min |     |
