# Supplementary material for: An Intronic SINE Insertion in FAM161A that Causes Exon-Skipping Is Associated with Progressive Retinal Atrophy in Tibetan Spaniels and Tibetan Terriers
Source: PubMed Central journal article supplement (PMC3976383; doi:10.1371/journal.pone.0093990), 2014-04-04
Supplement: pone.0093990.s005.pdf [file pone.0093990.s005.pdf]

| F primer Name                                                               | F primer Seq (5'-3')         | R primer Name   | R primer Seq (5'-3')       | Product size (bp) |
|-----------------------------------------------------------------------------|------------------------------|-----------------|----------------------------|-------------------|
| <b>Primers for sanger sequencing of retinal cDNA</b>                        |                              |                 |                            |                   |
| FAM161A_cDNA1_F                                                             | CATGGCAGCCTCGCAG             | FAM161A_cDNA1_R | AAGTTGGGCAACTCATCTTCA      | 540               |
| FAM161A_cDNA2_F                                                             | CCACTTGGAACACTATGGCAAA       | FAM161A_cDNA2_R | TTTGCACTTGCACCTTCTCCT      | 1203              |
| FAM161A_cDNA3_F                                                             | TTTTCCCCCTTTATCATGACC        | FAM161A_cDNA3_R | CCAGGCTACAGATGACTTTGC      | 1423              |
| FAM161A_cDNA4_F                                                             | GCAGACATTGCAGCAGATGAG        | FAM161A_cDNA4_R | CTTTGAAACAAACTCATCAG       | 510               |
| <b>Primers for sanger sequencing of gDNA</b>                                |                              |                 |                            |                   |
| FAM161A_ex5_F                                                               | TTCATCTCTTCAGGCCAGTGT        | FAM161A_ex5_R   | ACTGCAGTAGCAGCGTGTCT       | 720               |
| <b>Allele-specific fluorescent primers for genotyping of SINE insertion</b> |                              |                 |                            |                   |
| FAM161A_AFF_F                                                               | GGATCCCTTTATTTGATTTTAGAAAG   | FAM161A_R       | 6FAM-CAACAAACACAACCTGAGCAA | 137               |
| FAM161A_NOR_F                                                               | TCCCTTCCTTTTATTTGATTTTAGAAAG | FAM161A_R       | 6FAM-CAACAAACACAACCTGAGCAA | 135               |

**PCR amplification for Sanger sequencing of gDNA and cDNA**

| PCR reaction components                 | Final Concentration |
|-----------------------------------------|---------------------|
| dNTPs (NEB)                             | 0.2 mM              |
| Forward primer                          | 0.5 µM              |
| Reverse Primer                          | 0.5 µM              |
| PCR buffer (Qiagen)                     | 1X                  |
| HotStarTaq Plus DNA Polymerase (Qiagen) | 1.2 units           |
| Q solution - optional (Qiagen)          | 1X                  |
| DNA template                            | 40 ng               |
| PCR grade water                         | up to 12 µL         |

**Thermal Cycling Parameters**

|               |     |
|---------------|-----|
| 94°C - 10 min | X35 |
| 94°C - 1 min  |     |
| 57°C - 1 min  |     |
| 72°C - 2 min  |     |
| 72°C - 10 min |     |

**PCR amplification for genotyping of SINE insertion**

| PCR reaction components                 | Final Concentration |
|-----------------------------------------|---------------------|
| dNTPs (NEB)                             | 0.2 mM              |
| FAM161A_AFF_F                           | 0.08 µM             |
| FAM161A_NOR_F                           | 0.08 µM             |
| FAM161A_R                               | 0.08 µM             |
| PCR buffer (Qiagen)                     | 1X                  |
| HotStarTaq Plus DNA Polymerase (Qiagen) | 0.6 units           |
| DNA template                            | 40 ng               |
| PCR grade water                         | up to 12 µL         |

**Thermal Cycling Parameters**

|                |     |
|----------------|-----|
| 94°C - 10 min  | X35 |
| 94°C - 1 min   |     |
| 60.5°C - 1 min |     |
| 72°C - 2 min   |     |
| 72°C - 10 min  |     |
