# Supplementary material for: An Intronic SINE Insertion in FAM161A that Causes Exon-Skipping Is Associated with Progressive Retinal Atrophy in Tibetan Spaniels and Tibetan Terriers
Source: PubMed Central journal article supplement (PMC3976383; doi:10.1371/journal.pone.0093990), 2014-04-04
Supplement: pone.0093990.s006.pdf [file pone.0093990.s006.pdf]

| Assay Name   | F primer Seq (5'-3')  | Probe sequence (5'-3')      | R primer Seq (5'-3')   | Product size (bp) | Efficiency (%) | r2     |
|--------------|-----------------------|-----------------------------|------------------------|-------------------|----------------|--------|
| FAM161A_FL   | TGCAGAAACTCCTGACAATCC | GGGCTAAAGCTTATGACTCCCATCAAA | TTCTCTCATCCTTTCTTTTCAC | 116               | 102.5          | 0.9904 |
| FAM161A_FL-5 | TGCAGAAACTCCTGACAATCC | GGGCTAAAGCTTATGACTCCCATCAAA | GCTTTTCTGCTGCCATTCTT   | 116               | 104.9          | 0.9924 |
| FAM161A_SH   | GGGAGAGAACAAGCCACAAG  | GGCCGCTACTGTTTCAAAGAGTTGC   | GCTGCCATTCTTGCAATTTT   | 140               | 102.9          | 0.9923 |
| FAM161A_SH-5 | AGCCTGTGCCTTGTAAGTGC  | CCCCCTCCAATGCCACAGT         | GCTGCCATTCTTGCAATTTT   | 90                | 106.4          | 0.9938 |
| TBP          | TCTGGCATATTTCTCGCTG   | ACTGTTCTCACTCTTGGCTCCCG     | TTCAGTTCTGGGAAGATGGTG  | 90                | 106.8          | 0.9938 |
| ACTB         | CCAACCGTGAGAAGATGACC  | CGAGACTTTCAACACCCCAGCCA     | CGTACAGGGACAGCACAG     | 90                | 97.9           | 0.995  |

| PCR reaction components                                    | Final Concentration |
|------------------------------------------------------------|---------------------|
| KAPA Probe Fast Universal qPCR mastermix (KAPA Biosystems) | 1X                  |
| PrimeTime qPCR assay mix (IDT)                             | 1X                  |
| cDNA                                                       | 4 µL                |
| PCR grade water                                            | up to 20 µL         |

**Thermal Cycling Parameters**

|               |     |
|---------------|-----|
| 95°C - 5 min  | X40 |
| 95°C - 10 sec |     |
| 57°C - 15 sec |     |
| 72°C - 15 sec |     |
